# Supplementary material for: Are the Effects of the Cholera Toxin and Isoproterenol on Human Keratinocytes’ Proliferative Potential Dependent on Whether They Are Co-Cultured with Human or Murine Fibroblast Feeder Layers?
Source: PubMed Central journal article supplement (PMC6121595; doi:10.3390/ijms19082174), 2018-07-25

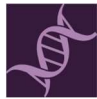

**Supplementary Materials Table S1.** Other culture-related information

| Population | cAMP inducer type | Feeder layer type | Passage | Seeded Keratinocytes (1×10 <sup>5</sup> cells/25 cm <sup>2</sup> ) | Passage length (days) | Confluence reached (%) |
|------------|-------------------|-------------------|---------|--------------------------------------------------------------------|-----------------------|------------------------|
| s1         | rISO              | iHFL              | P1      | 2                                                                  | 4.06                  | 95                     |
|            |                   |                   | P2      | 1                                                                  | 4.77                  | 95                     |
|            |                   |                   | P3      | 2                                                                  | 4.22                  | 95                     |
|            |                   | i3T3FL            | P1      | 1                                                                  | 7.08                  | 95                     |
|            |                   |                   | P2      | 1                                                                  | 6.83                  | 95                     |
|            |                   |                   | P3      | 1                                                                  | 6.92                  | 90                     |
|            | cISO              | iHFL              | P1      | 2                                                                  | 4.06                  | 95                     |
|            |                   |                   | P2      | 1                                                                  | 4.77                  | 95                     |
|            |                   |                   | P3      | 2                                                                  | 4.22                  | 95                     |
|            |                   | i3T3FL            | P1      | 1                                                                  | 7.08                  | 95                     |
|            |                   |                   | P2      | 1                                                                  | 6.83                  | 95                     |
|            |                   |                   | P3      | 1                                                                  | 6.92                  | 90                     |
|            | CT                | iHFL              | P1      | 2                                                                  | 4.06                  | 95                     |
|            |                   |                   | P2      | 1                                                                  | 4.77                  | 85                     |
|            |                   |                   | P3      | 2                                                                  | 4.22                  | 90                     |
|            |                   | i3T3FL            | P1      | 1                                                                  | 7.08                  | 85                     |
|            |                   |                   | P2      | 1                                                                  | 6.83                  | 85                     |
|            |                   |                   | P3      | 1                                                                  | 6.92                  | 35                     |
| s2         | rISO              | iHFL              | P1      | 2                                                                  | 4.04                  | 85                     |
|            |                   |                   | P2      | 2                                                                  | 3.77                  | 95                     |
|            |                   |                   | P3      | 2                                                                  | 4.21                  | 85                     |
|            |                   | i3T3FL            | P1      | 1                                                                  | 7.08                  | 90                     |
|            |                   |                   | P2      | 1                                                                  | 10.81                 | 80                     |
|            |                   |                   | P3      | 1                                                                  | 15.82                 | N/A                    |
|            | cISO              | iHFL              | P1      | 2                                                                  | 4.06                  | 90                     |
|            |                   |                   | P2      | 1                                                                  | 4.77                  | 90                     |
|            |                   |                   | P3      | 2                                                                  | 4.22                  | 90                     |
|            |                   | i3T3FL            | P1      | 1                                                                  | 7.08                  | 90                     |
|            |                   |                   | P2      | 1                                                                  | 10.81                 | 90                     |
|            |                   |                   | P3      | 1                                                                  | 15.82                 | N/A                    |
|            | CT                | iHFL              | P1      | 2                                                                  | 4.06                  | 80                     |
|            |                   |                   | P2      | 1                                                                  | 4.77                  | 80                     |
|            |                   |                   | P3      | 2                                                                  | 4.22                  | 70                     |
|            |                   | i3T3FL            | P1      | 1                                                                  | 7.08                  | 80                     |
|            |                   |                   | P2      | 1                                                                  | 10.81                 | 40                     |
|            |                   |                   | P3      | 1                                                                  | 15.82                 | N/A                    |
| s3         | rISO              | iHFL              | P1      | 2                                                                  | 4.02                  | 75                     |
|            |                   |                   | P2      | 1                                                                  | 4.61                  | 70                     |
|            |                   |                   | P3      | 1                                                                  | 5.19                  | 60                     |
|            |                   | i3T3FL            | P1      | 2                                                                  | 6.02                  | 95                     |
|            |                   |                   | P2      | 1                                                                  | 5.93                  | 75                     |
|            |                   |                   | P3      | 1                                                                  | 7.16                  | 45                     |

|    |      |        |    |   |      |    |
|----|------|--------|----|---|------|----|
|    | cISO | iHFL   | P1 | 2 | 4.02 | 75 |
|    |      |        | P2 | 1 | 4.61 | 70 |
|    |      |        | P3 | 1 | 5.19 | 80 |
|    |      | i3T3FL | P1 | 2 | 6.02 | 95 |
|    |      |        | P2 | 1 | 5.93 | 85 |
|    |      |        | P3 | 1 | 7.16 | 90 |
|    | CT   | iHFL   | P1 | 2 | 4.02 | 65 |
|    |      |        | P2 | 1 | 4.61 | 60 |
|    |      |        | P3 | 1 | 5.19 | 60 |
|    |      | i3T3FL | P1 | 2 | 6.02 | 95 |
|    |      |        | P2 | 1 | 5.93 | 65 |
|    |      |        | P3 | 1 | 7.16 | 50 |
| s4 | rISO | iHFL   | P1 | 1 | 5.11 | 85 |
|    |      |        | P2 | 1 | 4.89 | 85 |
|    |      |        | P3 | 2 | 4.14 | 80 |
|    |      | i3T3FL | P1 | 3 | 4.93 | 95 |
|    |      |        | P2 | 1 | 6.91 | 95 |
|    |      |        | P3 | 1 | 6.82 | 60 |
|    | cISO | iHFL   | P1 | 1 | 5.11 | 90 |
|    |      |        | P2 | 1 | 4.89 | 95 |
|    |      |        | P3 | 2 | 4.14 | 75 |
|    |      | i3T3FL | P1 | 3 | 4.93 | 95 |
|    |      |        | P2 | 1 | 6.91 | 95 |
|    |      |        | P3 | 1 | 6.82 | 80 |
|    | CT   | iHFL   | P1 | 1 | 5.11 | 80 |
|    |      |        | P2 | 1 | 4.89 | 80 |
|    |      |        | P3 | 2 | 4.14 | 60 |
|    |      | i3T3FL | P1 | 3 | 4.93 | 95 |
|    |      |        | P2 | 1 | 6.91 | 75 |
|    |      |        | P3 | 1 | 6.82 | 40 |

**Supplementary Materials Table S2.** R-ready data

| primo  | anato     | pop | camp | flayer | pass | xdd  | xms   | xhfe  |
|--------|-----------|-----|------|--------|------|------|-------|-------|
| cryo   | breastred | s1  | rISO | IHFL   | P1   | 1.10 | 15.83 | 11.10 |
| cryo   | breastred | s1  | rISO | IHFL   | P2   | 1.16 | 15.81 | 9.67  |
| cryo   | breastred | s1  | rISO | IHFL   | P3   | 1.07 | 15.92 | 7.05  |
| cryo   | breastred | s1  | rISO | i3T3FL | P1   | 0.91 | 14.32 | 2.87  |
| cryo   | breastred | s1  | rISO | i3T3FL | P2   | 0.79 | 15.32 | 3.27  |
| cryo   | breastred | s1  | rISO | i3T3FL | P3   | 0.64 | 16.49 | 0.63  |
| cryo   | breastred | s1  | cISO | IHFL   | P1   | 1.06 | 15.95 | 9.05  |
| cryo   | breastred | s1  | cISO | IHFL   | P2   | 1.18 | 15.82 | 9.24  |
| cryo   | breastred | s1  | cISO | IHFL   | P3   | 1.11 | 15.92 | 7.57  |
| cryo   | breastred | s1  | cISO | i3T3FL | P1   | 0.92 | 14.23 | 3.77  |
| cryo   | breastred | s1  | cISO | i3T3FL | P2   | 0.83 | 14.89 | 5.43  |
| cryo   | breastred | s1  | cISO | i3T3FL | P3   | 0.72 | 15.95 | 1.60  |
| cryo   | breastred | s1  | TC   | IHFL   | P1   | 0.93 | 15.68 | 7.81  |
| cryo   | breastred | s1  | TC   | IHFL   | P2   | 1.00 | 15.75 | 8.43  |
| cryo   | breastred | s1  | TC   | IHFL   | P3   | 0.96 | 15.89 | 6.33  |
| cryo   | breastred | s1  | TC   | i3T3FL | P1   | 0.85 | 14.31 | 2.57  |
| cryo   | breastred | s1  | TC   | i3T3FL | P2   | 0.73 | 15.95 | 1.80  |
| cryo   | breastred | s1  | TC   | i3T3FL | P3   | 0.46 | 16.11 | 0.03  |
| cryo   | facelift  | s2  | rISO | IHFL   | P1   | 0.93 | 16.49 | 4.67  |
| cryo   | facelift  | s2  | rISO | IHFL   | P2   | 1.15 | 16.24 | 5.00  |
| cryo   | facelift  | s2  | rISO | IHFL   | P3   | 0.87 | 16.39 | 1.71  |
| cryo   | facelift  | s2  | rISO | i3T3FL | P1   | 0.86 | 14.43 | 3.53  |
| cryo   | facelift  | s2  | rISO | i3T3FL | P2   | 0.38 | 17.09 | 0.17  |
| cryo   | facelift  | s2  | rISO | i3T3FL | P3   | 0.17 | 15.40 | 0.00  |
| cryo   | facelift  | s2  | cISO | IHFL   | P1   | 1.03 | 15.69 | 6.05  |
| cryo   | facelift  | s2  | cISO | IHFL   | P2   | 1.01 | 15.98 | 2.81  |
| cryo   | facelift  | s2  | cISO | IHFL   | P3   | 0.82 | 16.51 | 1.05  |
| cryo   | facelift  | s2  | cISO | i3T3FL | P1   | 0.88 | 14.26 | 3.43  |
| cryo   | facelift  | s2  | cISO | i3T3FL | P2   | 0.43 | 17.09 | 0.40  |
| cryo   | facelift  | s2  | cISO | i3T3FL | P3   | 0.19 | 15.00 | 0.07  |
| cryo   | facelift  | s2  | TC   | IHFL   | P1   | 1.55 | 15.77 | 3.29  |
| cryo   | facelift  | s2  | TC   | IHFL   | P2   | 0.98 | 15.85 | 2.71  |
| cryo   | facelift  | s2  | TC   | IHFL   | P3   | 0.61 | 16.55 | 0.48  |
| cryo   | facelift  | s2  | TC   | i3T3FL | P1   | 0.82 | 14.42 | 2.60  |
| cryo   | facelift  | s2  | TC   | i3T3FL | P2   | 0.30 | 16.94 | 0.00  |
| cryo   | facelift  | s2  | TC   | i3T3FL | P3   | 0.12 | 15.24 | 0.00  |
| nocryo | breastred | s3  | rISO | IHFL   | P1   | 0.71 | 16.80 | 7.67  |
| nocryo | breastred | s3  | rISO | IHFL   | P2   | 0.82 | 16.86 | 6.43  |
| nocryo | breastred | s3  | rISO | IHFL   | P3   | 0.70 | 17.27 | 1.71  |
| nocryo | breastred | s3  | rISO | i3T3FL | P1   | 0.68 | 16.11 | 3.83  |
| nocryo | breastred | s3  | rISO | i3T3FL | P2   | 0.74 | 16.58 | 1.53  |
| nocryo | breastred | s3  | rISO | i3T3FL | P3   | 0.48 | 18.17 | 0.33  |
| nocryo | breastred | s3  | cISO | IHFL   | P1   | 0.77 | 16.60 | 9.00  |
| nocryo | breastred | s3  | cISO | IHFL   | P2   | 0.78 | 16.96 | 6.29  |

|        |           |    |      |        |    |      |       |       |
|--------|-----------|----|------|--------|----|------|-------|-------|
| nocryo | breastred | s3 | cISO | IHFL   | P3 | 0.84 | 16.92 | 5.33  |
| nocryo | breastred | s3 | cISO | i3T3FL | P1 | 0.76 | 15.69 | 3.73  |
| nocryo | breastred | s3 | cISO | i3T3FL | P2 | 0.79 | 16.18 | 2.57  |
| nocryo | breastred | s3 | cISO | i3T3FL | P3 | 0.67 | 17.30 | 0.80  |
| nocryo | breastred | s3 | TC   | IHFL   | P1 | 0.51 | 16.71 | 4.86  |
| nocryo | breastred | s3 | TC   | IHFL   | P2 | 0.63 | 17.43 | 3.95  |
| nocryo | breastred | s3 | TC   | IHFL   | P3 | 0.70 | 16.98 | 2.33  |
| nocryo | breastred | s3 | TC   | i3T3FL | P1 | 0.77 | 15.50 | 3.33  |
| nocryo | breastred | s3 | TC   | i3T3FL | P2 | 0.76 | 16.03 | 1.80  |
| nocryo | breastred | s3 | TC   | i3T3FL | P3 | 0.54 | 17.24 | 0.17  |
| nocryo | facelift  | s4 | rISO | IHFL   | P1 | 0.93 | 16.75 | 9.48  |
| nocryo | facelift  | s4 | rISO | IHFL   | P2 | 1.01 | 16.15 | 6.62  |
| nocryo | facelift  | s4 | rISO | IHFL   | P3 | 0.85 | 16.30 | 3.67  |
| nocryo | facelift  | s4 | rISO | i3T3FL | P1 | 0.88 | 14.97 | 3.10  |
| nocryo | facelift  | s4 | rISO | i3T3FL | P2 | 0.79 | 15.97 | 1.30  |
| nocryo | facelift  | s4 | rISO | i3T3FL | P3 | 0.56 | 17.38 | 0.07  |
| nocryo | facelift  | s4 | cISO | IHFL   | P1 | 0.94 | 17.02 | 10.38 |
| nocryo | facelift  | s4 | cISO | IHFL   | P2 | 0.99 | 15.80 | 7.05  |
| nocryo | facelift  | s4 | cISO | IHFL   | P3 | 0.86 | 16.29 | 3.76  |
| nocryo | facelift  | s4 | cISO | i3T3FL | P1 | 0.89 | 14.99 | 5.23  |
| nocryo | facelift  | s4 | cISO | i3T3FL | P2 | 0.82 | 15.59 | 2.80  |
| nocryo | facelift  | s4 | cISO | i3T3FL | P3 | 0.66 | 17.51 | 0.37  |
| nocryo | facelift  | s4 | TC   | IHFL   | P1 | 0.91 | 16.17 | 10.10 |
| nocryo | facelift  | s4 | TC   | IHFL   | P2 | 1.05 | 16.18 | 5.38  |
| nocryo | facelift  | s4 | TC   | IHFL   | P3 | 0.78 | 16.43 | 2.76  |
| nocryo | facelift  | s4 | TC   | i3T3FL | P1 | 0.85 | 14.63 | 2.57  |
| nocryo | facelift  | s4 | TC   | i3T3FL | P2 | 0.67 | 16.40 | 0.37  |
| nocryo | facelift  | s4 | TC   | i3T3FL | P3 | 0.45 | 16.92 | 0.13  |

This table must be imported into R and converted into a data frame to carry out the statistical analyses of the Supplementary Materials Appendix SA. The variable names are intentionally uncapitalized, simple (no special characters or spaces) and as short as possible to facilitate coding in R. **primo** is a categorical random factor which indicates whether the keratinocytes have been cryopreserved after primoculture or not. **anato** is a categorical random factor which indicates from which anatomical site the keratinocytes were isolated from. **pop** is not used in the statistical models herein and simply designates the keratinocyte populations used in this study. **camp** and **flayer** are both the categorical fixed factors investigated here. They indicate what cAMP inducer type was added to the culture medium and on which feeder layer type the keratinocytes were cultured respectively. **pass** is a categorical fixed factor which indicates on which passage the keratinocytes were. **xdd**, **xms**, and **xhfe** are the three response variable (or proliferative potential proxies) measured in this study. They are mean values of technical replicates and stand for daily population doublings, mean cell size and holoclone-forming efficiency respectively.

## Supplementary Materials Figure S1. Annotated R script

```
# _____ Set Up _____

#Set working directory
setwd("C:/Users/CortezGhios/Desktop")

#Import file, format data, and create data frame
IData<-read.table("SuppMatTable2.txt",sep="\t",header=T)
primo<-IData$primo
anato<-IData$anato
pop<-IData$pop
camp<-IData$camp
flayer<-IData$flayer
pass<-IData$pass
xdd<-IData$xdd
xms<-IData$xms
xhfe<-IData$xhfe
Data<-data.frame(primo,anato,pop,camp,flayer,pass,xms,xdd,xhfe)
Data

##      primo      anato  pop  camp  flayer  pass   xms   xdd  xhfe
## 1    cryo  breastred  s1  rISO   iHFL   P1  15.83  1.10  11.10
## 2    cryo  breastred  s1  rISO   iHFL   P2  15.81  1.16   9.67
## 3    cryo  breastred  s1  rISO   iHFL   P3  15.92  1.07   7.05
## 4    cryo  breastred  s1  rISO  i3T3FL   P1  14.32  0.91   2.87
## 5    cryo  breastred  s1  rISO  i3T3FL   P2  15.32  0.79   3.27
## 6    cryo  breastred  s1  rISO  i3T3FL   P3  16.49  0.64   0.63
## 7    cryo  breastred  s1  CISO   iHFL   P1  15.95  1.06   9.05
## 8    cryo  breastred  s1  CISO   iHFL   P2  15.82  1.18   9.24
## 9    cryo  breastred  s1  CISO   iHFL   P3  15.92  1.11   7.57
## 10   cryo  breastred  s1  CISO  i3T3FL   P1  14.23  0.92   3.77
## 11   cryo  breastred  s1  CISO  i3T3FL   P2  14.89  0.83   5.43
## 12   cryo  breastred  s1  CISO  i3T3FL   P3  15.95  0.72   1.60
## 13   cryo  breastred  s1   TC   iHFL   P1  15.68  0.93   7.81
## 14   cryo  breastred  s1   TC   iHFL   P2  15.75  1.00   8.43
## 15   cryo  breastred  s1   TC   iHFL   P3  15.89  0.96   6.33
## 16   cryo  breastred  s1   TC  i3T3FL   P1  14.31  0.85   2.57
## 17   cryo  breastred  s1   TC  i3T3FL   P2  15.95  0.73   1.80
## 18   cryo  breastred  s1   TC  i3T3FL   P3  16.11  0.46   0.03
## 19   cryo  facelift  s2  rISO   iHFL   P1  16.49  0.93   4.67
## 20   cryo  facelift  s2  rISO   iHFL   P2  16.24  1.15   5.00
## 21   cryo  facelift  s2  rISO   iHFL   P3  16.39  0.87   1.71
## 22   cryo  facelift  s2  rISO  i3T3FL   P1  14.43  0.86   3.53
## 23   cryo  facelift  s2  rISO  i3T3FL   P2  17.09  0.38   0.17
## 24   cryo  facelift  s2  rISO  i3T3FL   P3  15.40  0.17   0.00
## 25   cryo  facelift  s2  CISO   iHFL   P1  15.69  1.03   6.05
## 26   cryo  facelift  s2  CISO   iHFL   P2  15.98  1.01   2.81
## 27   cryo  facelift  s2  CISO   iHFL   P3  16.51  0.82   1.05
## 28   cryo  facelift  s2  CISO  i3T3FL   P1  14.26  0.88   3.43
## 29   cryo  facelift  s2  CISO  i3T3FL   P2  17.09  0.43   0.40
## 30   cryo  facelift  s2  CISO  i3T3FL   P3  15.00  0.19   0.07
## 31   cryo  facelift  s2   TC   iHFL   P1  15.77  1.55   3.29
## 32   cryo  facelift  s2   TC   iHFL   P2  15.85  0.98   2.71
## 33   cryo  facelift  s2   TC   iHFL   P3  16.55  0.61   0.48
```

```

## 34 cryo facelift s2 TC i3T3FL P1 14.42 0.82 2.60
## 35 cryo facelift s2 TC i3T3FL P2 16.94 0.30 0.00
## 36 cryo facelift s2 TC i3T3FL P3 15.24 0.12 0.00
## 37 nocryo breastred s3 rISO iHFL P1 16.80 0.71 7.67
## 38 nocryo breastred s3 rISO iHFL P2 16.86 0.82 6.43
## 39 nocryo breastred s3 rISO iHFL P3 17.27 0.70 1.71
## 40 nocryo breastred s3 rISO i3T3FL P1 16.11 0.68 3.83
## 41 nocryo breastred s3 rISO i3T3FL P2 16.58 0.74 1.53
## 42 nocryo breastred s3 rISO i3T3FL P3 18.17 0.48 0.33
## 43 nocryo breastred s3 cISO iHFL P1 16.60 0.77 9.00
## 44 nocryo breastred s3 cISO iHFL P2 16.96 0.78 6.29
## 45 nocryo breastred s3 cISO iHFL P3 16.92 0.84 5.33
## 46 nocryo breastred s3 cISO i3T3FL P1 15.69 0.76 3.73
## 47 nocryo breastred s3 cISO i3T3FL P2 16.18 0.79 2.57
## 48 nocryo breastred s3 cISO i3T3FL P3 17.30 0.67 0.80
## 49 nocryo breastred s3 TC iHFL P1 16.71 0.51 4.86
## 50 nocryo breastred s3 TC iHFL P2 17.43 0.63 3.95
## 51 nocryo breastred s3 TC iHFL P3 16.98 0.70 2.33
## 52 nocryo breastred s3 TC i3T3FL P1 15.50 0.77 3.33
## 53 nocryo breastred s3 TC i3T3FL P2 16.03 0.76 1.80
## 54 nocryo breastred s3 TC i3T3FL P3 17.24 0.54 0.17
## 55 nocryo facelift s4 rISO iHFL P1 16.75 0.93 9.48
## 56 nocryo facelift s4 rISO iHFL P2 16.15 1.01 6.62
## 57 nocryo facelift s4 rISO iHFL P3 16.30 0.85 3.67
## 58 nocryo facelift s4 rISO i3T3FL P1 14.97 0.88 3.10
## 59 nocryo facelift s4 rISO i3T3FL P2 15.97 0.79 1.30
## 60 nocryo facelift s4 rISO i3T3FL P3 17.38 0.56 0.07
## 61 nocryo facelift s4 cISO iHFL P1 17.02 0.94 10.38
## 62 nocryo facelift s4 cISO iHFL P2 15.80 0.99 7.05
## 63 nocryo facelift s4 cISO iHFL P3 16.29 0.86 3.76
## 64 nocryo facelift s4 cISO i3T3FL P1 14.99 0.89 5.23
## 65 nocryo facelift s4 cISO i3T3FL P2 15.59 0.82 2.80
## 66 nocryo facelift s4 cISO i3T3FL P3 17.51 0.66 0.37
## 67 nocryo facelift s4 TC iHFL P1 16.17 0.91 10.10
## 68 nocryo facelift s4 TC iHFL P2 16.18 1.05 5.38
## 69 nocryo facelift s4 TC iHFL P3 16.43 0.78 2.76
## 70 nocryo facelift s4 TC i3T3FL P1 14.63 0.85 2.57
## 71 nocryo facelift s4 TC i3T3FL P2 16.40 0.67 0.37
## 72 nocryo facelift s4 TC i3T3FL P3 16.92 0.45 0.13

```

```

#Load necessary packages

```

```

library(ARTool) #Non-parametric linear mixed models

```

```

## Loading required package: lme4

```

```

## Loading required package: Matrix

```

```

## Loading required package: Rcpp

```

```

## Loading required package: car

```

```

library(lsmmeans) #Post-hoc pairwise comparisons of significant factor
effects (Tukey)

```

```

## Loading required package: estimability

```

```

library(phia) #Post-hoc pairwise comparisons of significant factor
interaction
effects (Holm)

```

```

# _____ Daily Doublings _____

#ART model fit
ddmod=art(xdd~camp*flayer*pass+(1|primo)+(1|anato),data=Data)
summary(ddmod)

## Aligned Rank Transform of Factorial Model
##
## Call:
## art(formula = xdd ~ camp * flayer * pass + (1 | primo) + (1 |
##      anato), data = Data)
##
## Column sums of aligned responses (should all be ~0):
##      camp      flayer      pass  camp:flayer
##      0          0          0          0
##      camp:pass  flayer:pass  camp:flayer:pass
##      0          0          0
##
## F values of ANOVAs on aligned responses not of interest (should all be
## ~0):
##      Min. 1st Qu.  Median    Mean 3rd Qu.    Max.
##      0      0      0      0      0      0

anova(ddmod)

## Aligned Rank Transform Anova Table (Type III tests)
##
## Response: art(xdd)
##      F Df Df.res    Pr(>F)
## camp      2.1826  2    52  0.12298
## flayer    50.7902  1    52 3.107e-09 ***
## pass     13.4236  2    52 1.994e-05 ***
## camp:flayer  0.3410  2    52  0.71263
## camp:pass   0.3604  4    52  0.83566
## flayer:pass  4.3351  2    52  0.01814 *
## camp:flayer:pass 0.1000  4    52  0.98197
## ---
## Signif. codes:  0 '***' 0.001 '**' 0.01 '*' 0.05 '.' 0.1 ' ' 1

#Post-hoc tests of significant factor effects
lsmeans(artlm(ddmod, "flayer"), pairwise ~ flayer)

## NOTE: Results may be misleading due to involvement in interactions
## $lsmeans
## flayer  lsmean      SE    df lower.CL upper.CL
## i3T3FL 22.48611 4.357767 1.48 -4.23582 49.20804
## iHFL   50.51389 4.357767 1.48 23.79196 77.23582
##
## Results are averaged over the levels of: camp, pass
## Confidence level used: 0.95
##
## $contrasts
## contrast      estimate      SE df t.ratio p.value
## i3T3FL - iHFL -28.02778 3.932773 52  -7.127  <.0001
##
## Results are averaged over the levels of: camp, pass

```

```
plot(xdd~flayer)
```

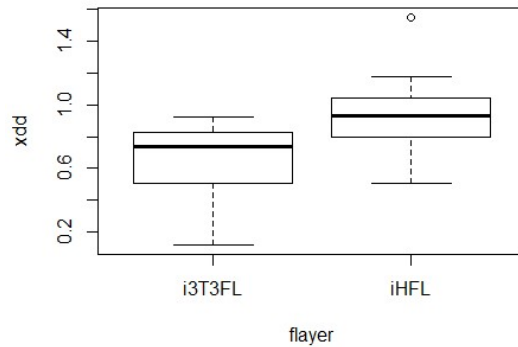

```
lsmeans(artlm(ddmod, "pass"), pairwise ~ pass)
```

```
## NOTE: Results may be misleading due to involvement in interactions
```

```
## $lsmeans
```

| ## pass | lsmean   | SE       | df   | lower.CL  | upper.CL |
|---------|----------|----------|------|-----------|----------|
| ## P1   | 47.20833 | 5.541129 | 2.09 | 24.311894 | 70.10477 |
| ## P2   | 41.95833 | 5.541129 | 2.09 | 19.061894 | 64.85477 |
| ## P3   | 20.33333 | 5.541129 | 2.09 | -2.563106 | 43.22977 |

```
##
```

```
## Results are averaged over the levels of: camp, flayer
```

```
## Confidence level used: 0.95
```

```
##
```

```
## $contrasts
```

| ## contrast | estimate | SE       | df | t.ratio | p.value |
|-------------|----------|----------|----|---------|---------|
| ## P1 - P2  | 5.250    | 5.498374 | 52 | 0.955   | 0.6084  |
| ## P1 - P3  | 26.875   | 5.498374 | 52 | 4.888   | <.0001  |
| ## P2 - P3  | 21.625   | 5.498374 | 52 | 3.933   | 0.0007  |

```
##
```

```
## Results are averaged over the levels of: camp, flayer
```

```
## P value adjustment: tukey method for comparing a family of 3 estimates
```

```
plot(xdd~pass)
```

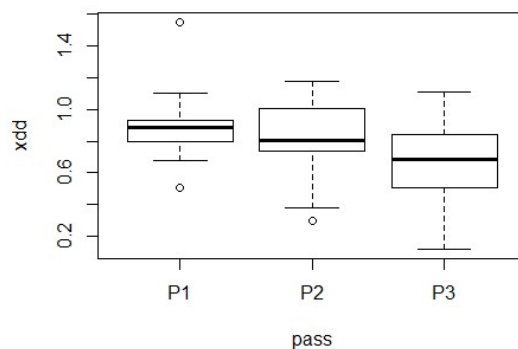

```
#Post-hoc test of the significant factor interaction effect
```

```
testInteractions(artlm(ddmod, "flayer:pass"), pairwise=c("flayer",  
"pass"), adjustment="holm")
```



```
## Chisq Test:
## P-value adjustment method: holm
##           Value Df  Chisq Pr(>Chisq)
## i3T3FL-iHFL : P1-P2 30.542  1 6.1136   0.02683 *
## i3T3FL-iHFL : P1-P3 32.375  1 6.8696   0.02630 *
## i3T3FL-iHFL : P2-P3  1.833  1 0.0220   0.88201
## ---
## Signif. codes:  0 '***' 0.001 '**' 0.01 '*' 0.05 '.' 0.1 ' ' 1
interaction.plot(pass, flayer, xdd, fun = mean)
```

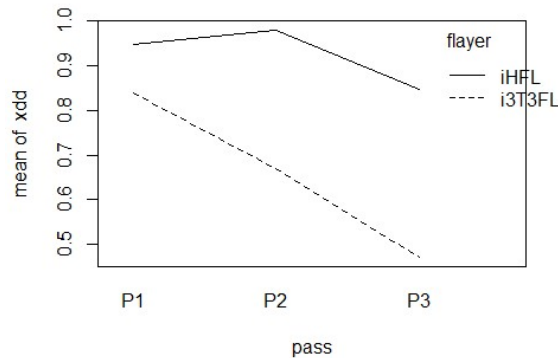

```
# _____ Mean cell size _____
```

```
#ART model fit
```

```
msmod=art(xms~camp*flayer*pass+(1|primo)+(1|anato),data=Data)
summary(msmod)
```

```
## Aligned Rank Transform of Factorial Model
```

```
##
```

```
## Call:
```

```
## art(formula = xms ~ camp * flayer * pass + (1 | primo) + (1 |
##   anato), data = Data)
```

```
##
```

```
## Column sums of aligned responses (should all be ~0):
```

```
##           camp           flayer           pass   camp:flayer
##           0             0             0             0
```

```
##           camp:pass   flayer:pass  camp:flayer:pass
```

```
##           0             0             0
```

```
##
```

```
## F values of ANOVAs on aligned responses not of interest (should all be
## ~0):
```

```
##   Min. 1st Qu.  Median    Mean 3rd Qu.    Max.
```

```
##   0         0         0         0         0         0
```

```
anova(msmod)
```

```
## warning in optwrap(optimizer, devfun, getStart(start, rho$lower,
## rho$pp), :
```

```
## convergence code 3 from bobyqa: bobyqa -- a trust region step failed
## to
```

```
## reduce q
```

```
## Aligned Rank Transform Anova Table (Type III tests)
```

```
##
```

```
## Response: art(xms)
##           F Df Df.res   Pr(>F)
## camp      0.9105 2     52 0.408631
## flayer    10.8800 1     52 0.001758 **
## pass     18.4371 2     52 8.870e-07 ***
## camp:flayer 0.1734 2     52 0.841247
## camp:pass  0.4121 4     52 0.799101
## flayer:pass 15.2170 2     52 6.271e-06 ***
## camp:flayer:pass 0.3438 4     52 0.847101
## ---
## Signif. codes:  0 '***' 0.001 '**' 0.01 '*' 0.05 '.' 0.1 ' ' 1

#Post-hoc tests of significant factor effects
lsmeans(artlm(msmod, "flayer"), pairwise ~ flayer)

## NOTE: Results may be misleading due to involvement in interactions

## $lsmeans
## flayer lsmean      SE   df  lower.CL upper.CL
## i3T3FL  29.5 12.02212 1.06 -103.09475 162.0947
## iHFL    43.5 12.02212 1.06  -89.09475 176.0947
##
## Results are averaged over the levels of: camp, pass
## Confidence level used: 0.95
##
## $contrasts
## contrast      estimate      SE df t.ratio p.value
## i3T3FL - iHFL      -14 4.24437 52  -3.298 0.0018
##
## Results are averaged over the levels of: camp, pass
plot(xms~flayer)
```

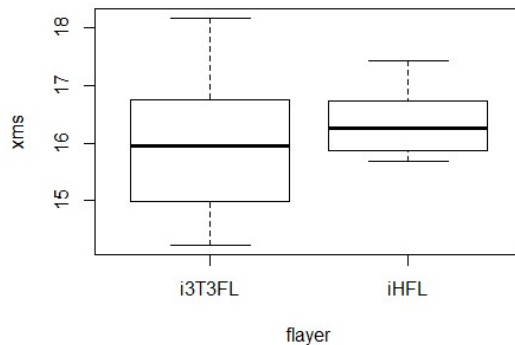

```
lsmeans(artlm(msmod, "pass"), pairwise ~ pass)

## NOTE: Results may be misleading due to involvement in interactions

## $lsmeans
## pass lsmean      SE   df  lower.CL upper.CL
## P1   21.08333 10.85968 1.13 -84.31321 126.4799
## P2   39.95833 10.85968 1.13 -65.43821 145.3549
## P3   48.45833 10.85968 1.13 -56.93821 153.8549
##
## Results are averaged over the levels of: camp, flayer
## Confidence level used: 0.95
```

```
##
## $contrasts
## contrast estimate SE df t.ratio p.value
## P1 - P2 -18.875 4.614748 52 -4.090 0.0004
## P1 - P3 -27.375 4.614748 52 -5.932 <.0001
## P2 - P3 -8.500 4.614748 52 -1.842 0.1662
##
## Results are averaged over the levels of: camp, flayer
## P value adjustment: tukey method for comparing a family of 3 estimates
plot(xms~pass)
```

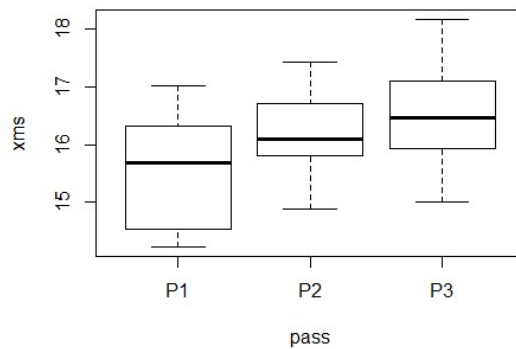

```
#Post-hoc test of the significant factor interaction effect
testInteractions(artlm(msmod, "flayer:pass"), pairwise=c("flayer",
"pass"), adjustment="holm")
```

```
## Chisq Test:
## P-value adjustment method: holm
## Value Df Chisq Pr(>Chisq)
## i3T3FL-iHFL : P1-P2 -43.333 1 21.3390 7.696e-06 ***
## i3T3FL-iHFL : P1-P3 -46.167 1 24.2207 2.577e-06 ***
## i3T3FL-iHFL : P2-P3 -2.833 1 0.0912 0.7626
## ---
## Signif. codes: 0 '***' 0.001 '**' 0.01 '*' 0.05 '.' 0.1 ' ' 1
interaction.plot(pass, flayer, xms, fun = mean)
```

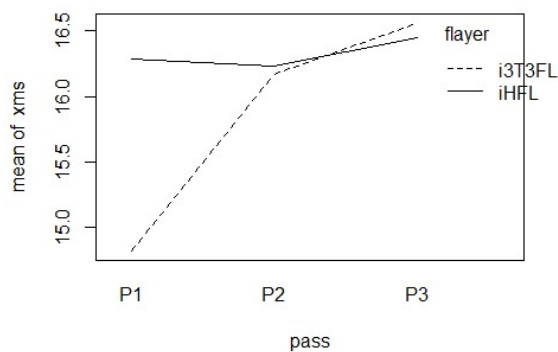

# Holoclone forming efficiency

#ART model fit

```

hfemod=art(xhfe~camp*flayer*pass+(1|primo)+(1|anato),data=Data)
summary(hfemod)

## Aligned Rank Transform of Factorial Model
##
## Call:
## art(formula = xhfe ~ camp * flayer * pass + (1 | primo) + (1 |
##      anato), data = Data)
##
## Column sums of aligned responses (should all be ~0):
##           camp           flayer           pass      camp:flayer
##           0             0             0             0
##      camp:pass      flayer:pass  camp:flayer:pass
##           0             0             0
##
## F values of ANOVAs on aligned responses not of interest (should all be
## ~0):
##      Min. 1st Qu.  Median    Mean 3rd Qu.    Max.
##           0         0         0         0         0         0

anova(hfemod)

## Aligned Rank Transform Anova Table (Type III tests)
##
## Response: art(xhfe)
##           F Df Df.res    Pr(>F)
## camp      6.6034 2     52 0.002783 **
## flayer    139.0165 1     52 2.607e-16 ***
## pass      27.9446 2     52 5.737e-09 ***
## camp:flayer  1.1803 2     52 0.315295
## camp:pass    0.3358 4     52 0.852609
## flayer:pass  2.2368 2     52 0.116976
## camp:flayer:pass 0.4339 4     52 0.783477
## ---
## Signif. codes:  0 '***' 0.001 '**' 0.01 '*' 0.05 '.' 0.1 ' ' 1

#Post-hoc tests of significant factor effects
lsmeans(artlm(hfemod, "camp"), pairwise ~ camp)

## NOTE: Results may be misleading due to involvement in interactions

## $lsmeans
##   camp  lsmean      SE  df lower.CL upper.CL
## cISO 46.20833 9.133385 1.31 -21.54423 113.9609
## rISO 37.58333 9.133385 1.31 -30.16923 105.3359
## TC   25.70833 9.133385 1.31 -42.04423  93.4609
##
## Results are averaged over the levels of: flayer, pass
## Confidence level used: 0.95
##
## $contrasts
##   contrast      estimate      SE  df t.ratio p.value
## cISO - rISO    8.625 5.664554 52   1.523 0.2888
## cISO - TC     20.500 5.664554 52   3.619 0.0019
## rISO - TC     11.875 5.664554 52   2.096 0.1004
##
## Results are averaged over the levels of: flayer, pass
## P value adjustment: tukey method for comparing a family of 3 estimates

```

```
plot(xhfe~camp)
```

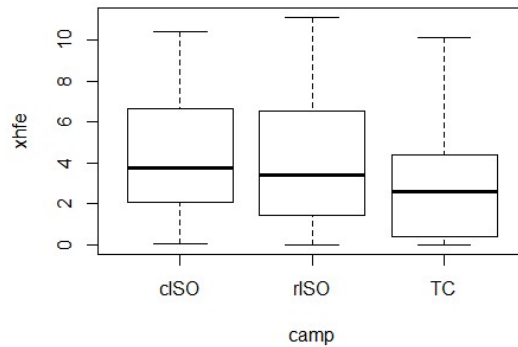

```
lsmmeans(artlm(hfemod, "flayer"), pairwise ~ flayer)
```

```
## NOTE: Results may be misleading due to involvement in interactions
```

```
## $lsmmeans
```

```
## flayer lsmmean SE df lower.CL upper.CL  
## i3T3FL 19.55556 5.980786 1.12 -39.430923 78.54203  
## iHFL 53.44444 5.980786 1.12 -5.542034 112.43092
```

```
##
```

```
## Results are averaged over the levels of: camp, pass
```

```
## Confidence level used: 0.95
```

```
##
```

```
## $contrasts
```

```
## contrast estimate SE df t.ratio p.value  
## i3T3FL - iHFL -33.88889 2.874247 52 -11.791 <.0001
```

```
##
```

```
## Results are averaged over the levels of: camp, pass
```

```
plot(xhfe~flayer)
```

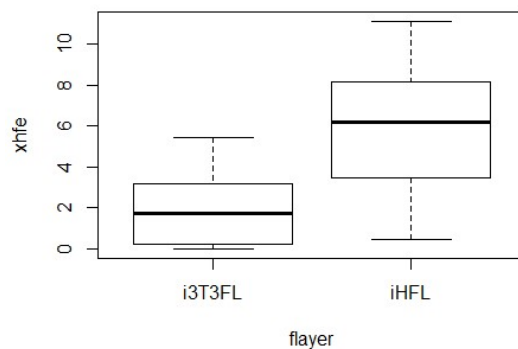

```
lsmmeans(artlm(hfemod, "pass"), pairwise ~ pass)
```

```
## NOTE: Results may be misleading due to involvement in interactions
```

```
## $lsmmeans
```

```
## pass lsmmean SE df lower.CL upper.CL  
## P1 53.04167 7.609867 1.29 -5.167541 111.25087  
## P2 37.50000 7.609867 1.29 -20.709208 95.70921  
## P3 18.95833 7.609867 1.29 -39.250875 77.16754
```

```
##  
## Results are averaged over the levels of: camp, flayer  
## Confidence level used: 0.95  
##  
## $contrasts  
## contrast estimate SE df t.ratio p.value  
## P1 - P2 15.54167 4.564977 52 3.405 0.0036  
## P1 - P3 34.08333 4.564977 52 7.466 <.0001  
## P2 - P3 18.54167 4.564977 52 4.062 0.0005  
##  
## Results are averaged over the levels of: camp, flayer  
## P value adjustment: tukey method for comparing a family of 3 estimates  
plot(xhfe~pass)
```

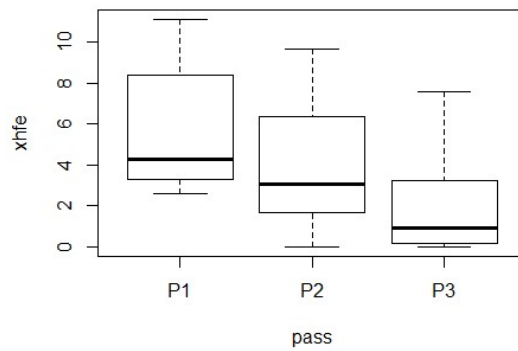

Supplement: ijms-19-02174-s001.pdf [file ijms-19-02174-s001.pdf]
